# Supplementary material
Source: publisher figshare collection journal article supplement (https://tandf.figshare.com/ndownloader/files/17661578)
Supplement: Supplementary file 1 [file 17661578]

Interactions in N-[(2-hydroxyl)-propyl-3-trimethyl ammonium] chitosan chloride/sodium carboxymethyl cellulose based films

Fig. S1 Plots of G’ versus oscillation strain for HTCC/CMC blend solutions with different plasticizer types at angular frequency of 10 rad/s.


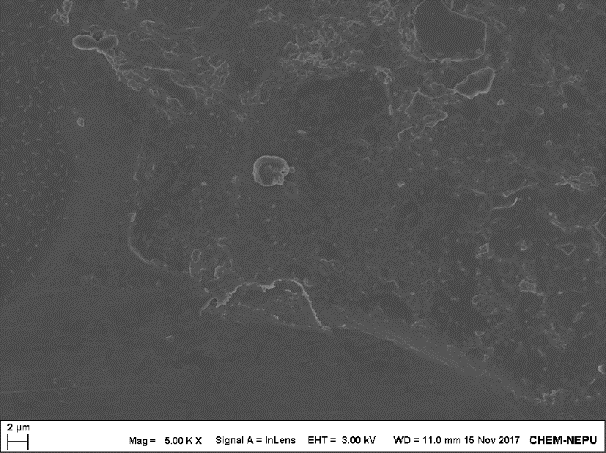


**A**


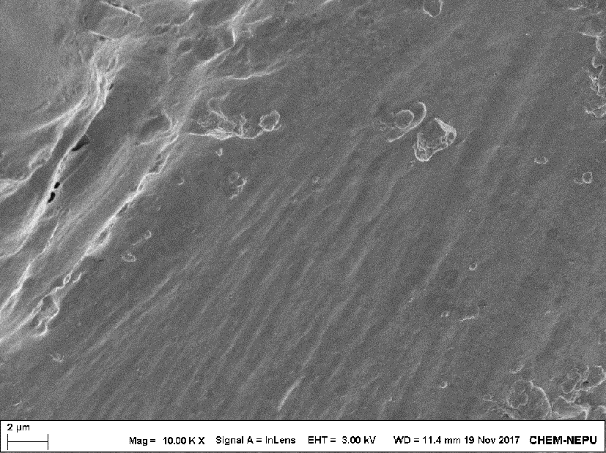


**B**

Fig.S2 Upper surface (A) and cross-section (B) SEM images of pure CMC films.
